# Supplementary material for: NLRP3 Inflammasome Activation in the Brain after Global Cerebral Ischemia and Regulation by 17β‐Estradiol
Source: Hindawi journal article supplement (doi:10.1155/2016/8309031), 2016-01-01

# Supplementary Figure 1

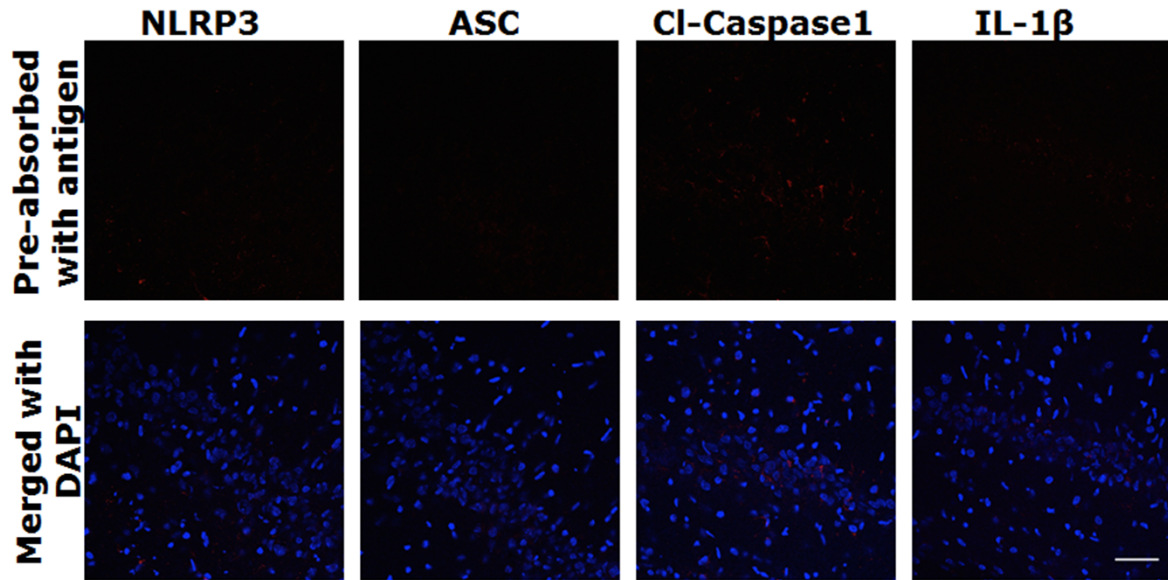

# Supplementary Figure 2

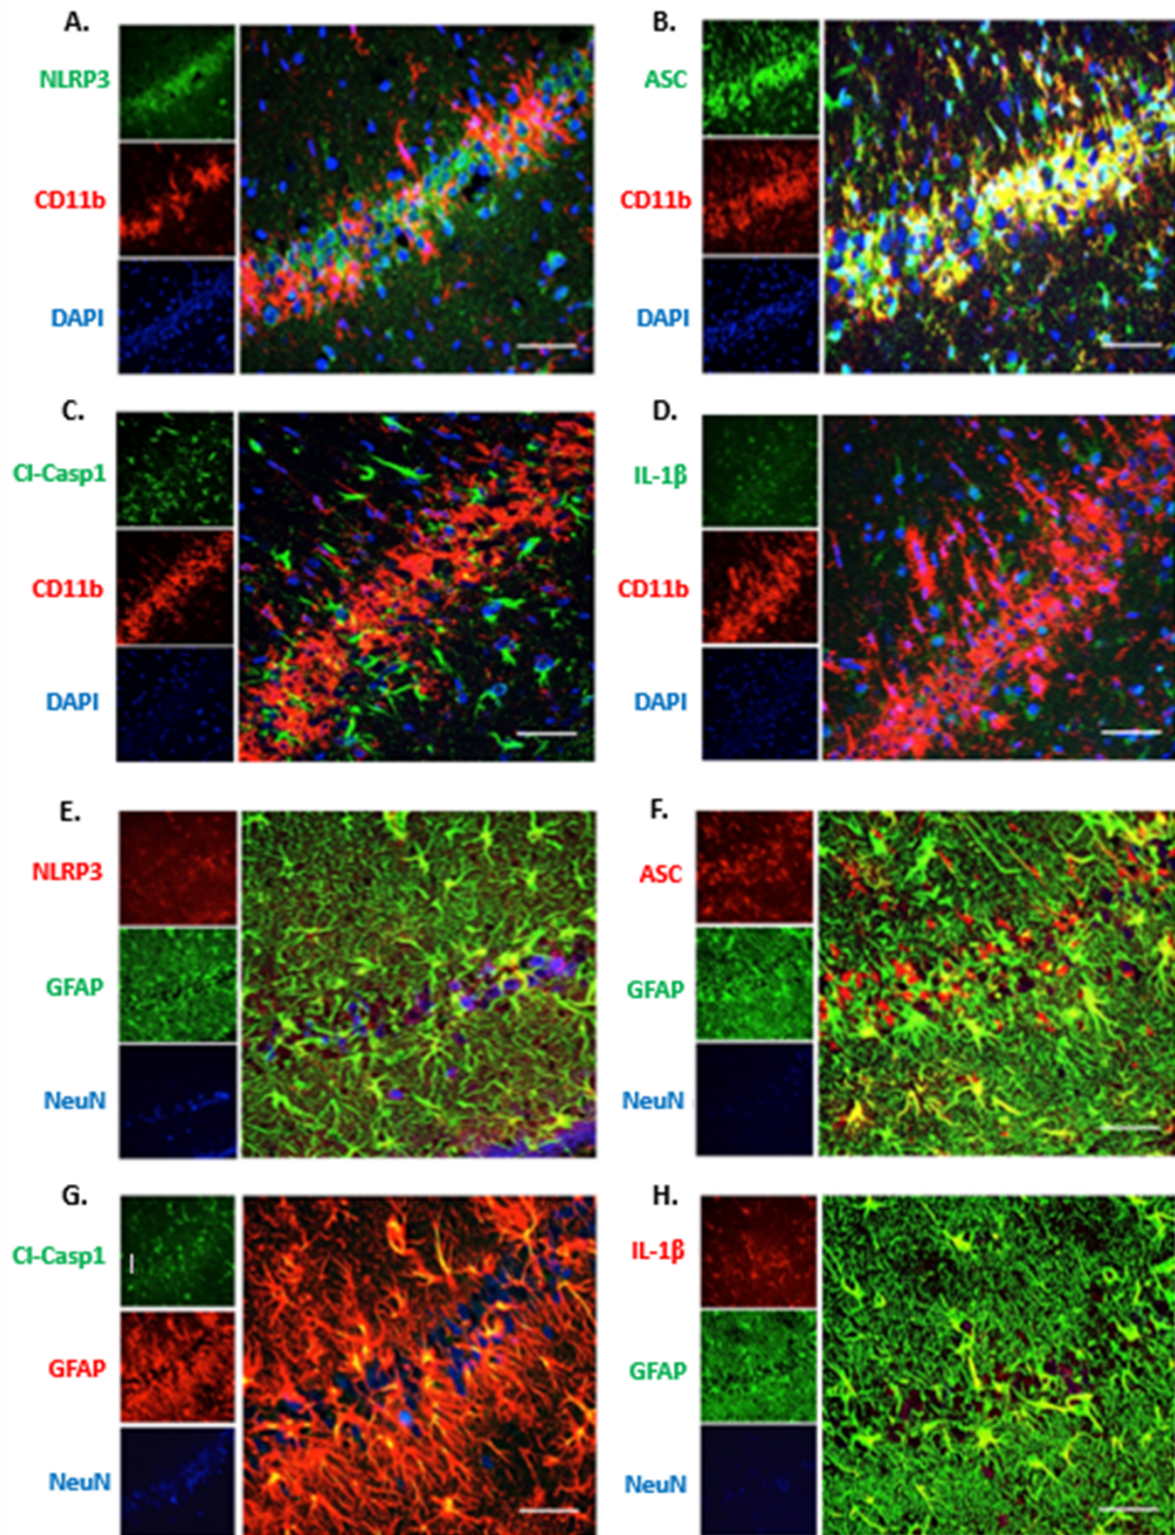

# Supplementary Figure 3

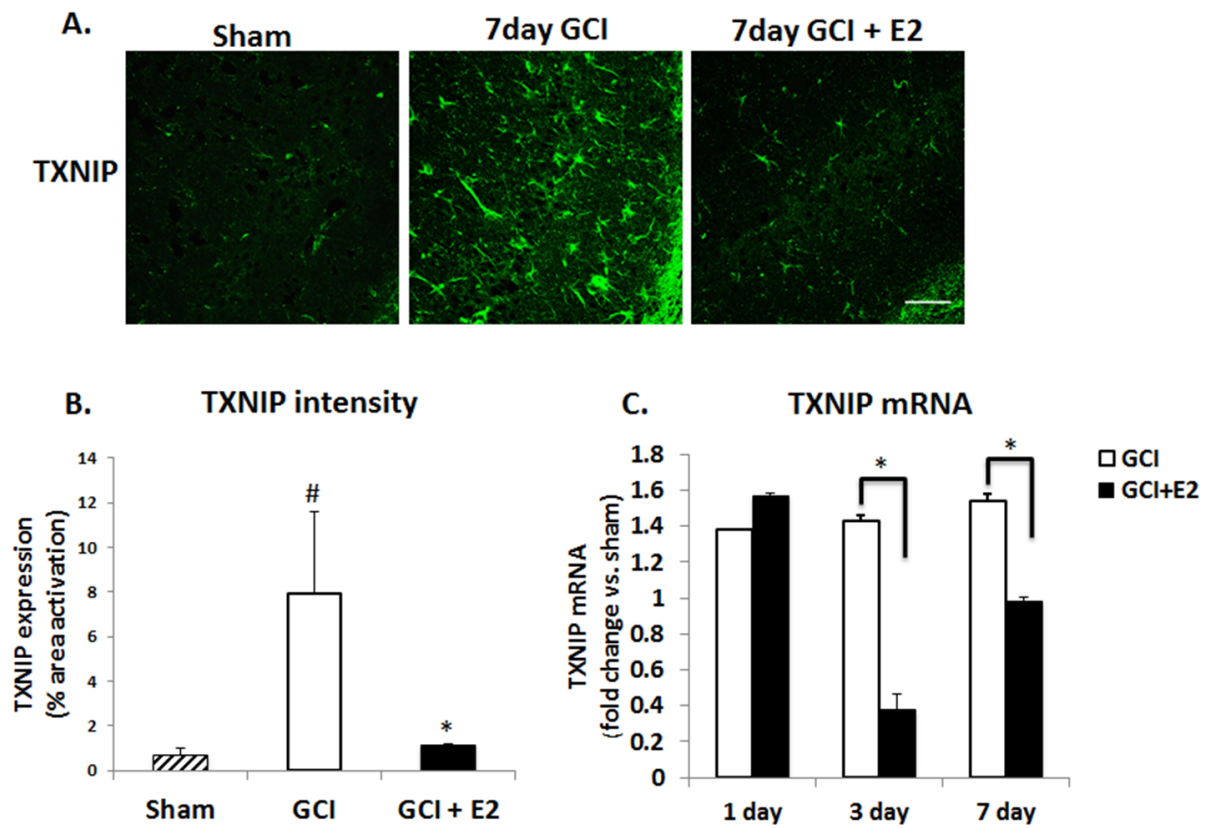

Supplement: f1 [file 8309031.f1.pdf]
